# Supplementary material
Source: PubMed Central journal article supplement (PMC8175076)
Supplement: NIHMS1661496-supplement-Supplemental_Data.pdf [file NIHMS1661496-supplement-Supplemental_Data.pdf]

## SUPPLEMENTAL DATA

**Supplemental Table S1: Pathogenicity Predictions for Missense Variants in Human HPS Genes**

|                           | mRNA Variant           | Amino Acid Variant <sup>1</sup> | Exon/ Intron | dbSNP ID <sup>2</sup><br>MAF ExAc <sup>3</sup> | ACMG Pathogenicity Prediction <sup>1</sup>                                 | Comments                                                                                                                                                                                                                                   |
|---------------------------|------------------------|---------------------------------|--------------|------------------------------------------------|----------------------------------------------------------------------------|--------------------------------------------------------------------------------------------------------------------------------------------------------------------------------------------------------------------------------------------|
| <b>HPS1 (NM_000195.5)</b> |                        |                                 |              |                                                |                                                                            |                                                                                                                                                                                                                                            |
| 1                         | c.316C>G               | p.Arg106Gly                     | ex 5         | rs376557022<br>0.00001                         | VUS (PM2 <sup>3</sup> , PP3 <sup>4</sup> , PP4 <sup>5</sup> ) <sup>6</sup> | (Wei et al., 2016)                                                                                                                                                                                                                         |
| 2                         | c.344T>C               | p.Leu115Pro                     | ex 5         | -                                              | VUS (PM2, PP3, PP4) <sup>6</sup>                                           | (Khan et al., 2016)                                                                                                                                                                                                                        |
| 3                         | c.505G>A               | p.Glu169Lys                     | ex 6         | -                                              | LP (PS3, PM2, PP1, PP3, PP4)                                               | At splice junction (Kahn et al., 2016). Predicted to create splice defect similar as reported for Glu169Glu (Merideth et al., 2009)                                                                                                        |
| 4                         | c.695C>T               | p.Ala232Val                     | ex 8         | rs764420988<br>0.00006                         | VUS (PP3, PP4) <sup>6</sup>                                                | (Khan et al., 2016). Despite high MAF, this variant is predicted deleterious to protein function                                                                                                                                           |
| 5                         | c.716T>C               | p.Leu239Pro                     | ex 8         | rs281865080<br>-                               | P (PS3, PM2, PM3, PP1, PP3, PP4)                                           | (Hermos et al., 2002; Lasseaux et al., 2018; Thielen et al., 2010). In vitro studies showed that the HPS1 protein with this variant is unstable and prevents proper BLOC-3 formation (Carmona-Rivera, et al., 2013)                        |
| 6                         | c.937G>A               | p.Gly313Ser                     | ex 10        | -                                              | P (PS3, PM2, PM3, PP3, PP4)                                                | (Lasseaux et al., 2018). At splice junction, a cryptic intronic splice site produces mis-spliced mRNA that includes 144-bp intronic sequence, producing 11 novel amino acids followed by a stop codon (Carmona-Rivera, Hess, et al., 2011) |
| 7                         | c.1080C>G              | p.Ser360Arg                     | ex 12        | -                                              | VUS (PM2, PM3) <sup>6</sup>                                                | Predicted medium deleterious to protein function <sup>7</sup>                                                                                                                                                                              |
| 8                         | c.1342T>C              | p.Trp448Arg                     | ex 14        | -                                              | VUS (PM2, PP1, PP3, PP4) <sup>6</sup>                                      | (Yousaf et al., 2016). Predicted deleterious to protein function. Predicted to not affect nearby splice site at c.1336                                                                                                                     |
| 9                         | c.1639G>T <sup>8</sup> | p.Val547Leu                     | ex 17        | -                                              | LP (PS3, PM2, PP1, PP3, PP4)                                               | In vitro studies showed that the HPS1 protein with this variant was unstable and prevents proper BLOC-3 formation (Carmona-Rivera et al., 2013; Nazarian et al., 2008)                                                                     |
| -                         | c.1645C>T <sup>8</sup> | p.Arg549Cys                     | ex 17        | rs747984964                                    | VUS (PM2, PP1, PP3, PP4) <sup>6</sup>                                      | (Nazarian et al., 2008)                                                                                                                                                                                                                    |
| 10                        | c.1763T>C              | p.Leu588Pro                     | ex 18        | -                                              | VUS (PM2, PP3, PP4) <sup>6</sup>                                           | (Okamura et al., 2019)                                                                                                                                                                                                                     |
| 11                        | c.1787G>T              | p.Gly596Val                     | ex 18        | rs139951191                                    | LP (PM2, PM3, PP3, PP4)                                                    | (Okamura et al., 2019; Takeuchi et al., 2014)                                                                                                                                                                                              |
| 12                        | c.1937A>G              | p.Tyr646Cys                     | ex 19        | -                                              | LP (PS3, PM2, PP1, PP3)                                                    | In vitro studies showed that the HPS1 protein with this variant was unstable and prevents proper BLOC-3 formation (Carmona-Rivera et al., 2013). Predicted to weaken the nearby splice site at c.1940 <sup>9</sup>                         |
| 13                        | c.1996G>A              | p.Glu666Lys                     | ex 20        | rs121908385<br>0.00001                         | VUS (PM2, PP3, PP4) <sup>6</sup>                                           | (Sim et al., 2019)                                                                                                                                                                                                                         |

|                            |           |             |       |                        |                                       |                                                                                                                                                                                                                                                                                                    |
|----------------------------|-----------|-------------|-------|------------------------|---------------------------------------|----------------------------------------------------------------------------------------------------------------------------------------------------------------------------------------------------------------------------------------------------------------------------------------------------|
| 14                         | c.1996G>C | p.Glu666Gln | ex 20 | -                      | VUS (PM2, PP3, PP4) <sup>6</sup>      | (Lasseaux et al., 2018)                                                                                                                                                                                                                                                                            |
| 15                         | c.2003T>C | p.Leu668Pro | ex 20 | rs281865090            | LP (PS3, PM2, PP3, PP4)               | (Ito et al., 2005; Iwata et al., 2017; Kanazu et al., 2014; Mai et al., 2019; Okamura et al., 2019; Wei et al., 2016). In vitro experiments showed Leu668Pro-HPS1 to be stable, but lacked the ability to stabilize the HPS4 protein, suggesting it cannot assemble into BLOC-3 (Ito et al., 2005) |
| <b>AP3B1 (NM_003664.4)</b> |           |             |       |                        |                                       |                                                                                                                                                                                                                                                                                                    |
| 1                          | c.2T>G    | p.Met1Arg   | ex 1  | -                      | P (PVS1, PM2, PP3)                    | Occurs in start codon. Predicted to affect protein translation (Cetica et al., 2015)                                                                                                                                                                                                               |
| 2                          | c.305T>C  | p.Leu102Pro | ex 4  | -                      | VUS (PM2, PP1, PP3, PP4) <sup>6</sup> | (Jessen et al., 2013)                                                                                                                                                                                                                                                                              |
| 3                          | c.1739T>G | p.Leu580Arg | ex 16 | rs121908904            | LP (PS3, PM2, PP1, PP3, PP4)          | Fibroblasts of this subject have decreased AP-3 assembly and function compared to normal cells (Dell'Angelica et al., 1999)                                                                                                                                                                        |
| 4                          | c.2702C>G | p.Ser901Cys | ex 23 | rs869312835            | LP (PS3, PM2, PP3, PP4)               | Activates a cryptic splice site (de Boer et al., 2017) <sup>10</sup>                                                                                                                                                                                                                               |
| <b>HPS3 (NM_032383.5)</b>  |           |             |       |                        |                                       |                                                                                                                                                                                                                                                                                                    |
| 1                          | c.1189C>T | p.Arg397Trp | ex 6  | rs121908316<br>0.00002 | LP (PS3, PM2, PP3, PP4)               | (Huizing et al., 2001; Okamura et al., 2019; Wei et al., 2016). Reported to destabilize BLOC-2 assembly (Nazarian et al., 2008; Wei et al., 2016)                                                                                                                                                  |
| 2                          | c.1509G>A | p.Met503Ile | ex 8  | rs780183200<br>0.00002 | VUS (PM2, PP1, PP3, PP4) <sup>6</sup> | At splice junction, predicted but not demonstrated to cause splicing defect, segregates with disease in a large Pakistani family (Yousaf et al., 2016)                                                                                                                                             |
| 3                          | c.1673T>C | p.Leu558Pro | ex 8  | -                      | VUS (PM2, PP1, PP3) <sup>6</sup>      | Occurs homozygous in 1 subject, both unaffected parents are a carrier (Lasseaux et al., 2018)                                                                                                                                                                                                      |
| <b>HPS4 (NM_022081.5)</b>  |           |             |       |                        |                                       |                                                                                                                                                                                                                                                                                                    |
| 1                          | c.272T>C  | p.Leu91Pro  | ex 4  | -                      | VUS (PM2, PP1, PP3, PP4) <sup>6</sup> | Occurred homozygous in two siblings. Variant segregated with disease in this family (Bastida et al., 2019)                                                                                                                                                                                         |
| 2                          | c.461A>G  | p.His154Arg | ex 6  | rs281865098            | LP (PM2, PM3, PP3, PP4)               | (Saito et al., 2013). Familial testing of one subject showed occurrence in trans with pathogenic variant p.Arg217* (PM3) (Anderson et al., 2003)                                                                                                                                                   |
| 3                          | c.554G>A  | p.Arg185His | ex 7  | rs111522254<br>0.00012 | VUS (PP3, PP4) <sup>6</sup>           | Relatively high frequency in ExAc (14 mostly South Asian alleles out of 121,412 chromosomes) (Arcot Sadagopan et al., 2016)                                                                                                                                                                        |
| 4                          | c.803G>A  | p.Arg268Lys | ex 10 | -                      | VUS (PM2, PP3, PP4) <sup>6</sup>      | Predicted to cause splicing defect. Occurred homozygous (Lasseaux et al., 2018)                                                                                                                                                                                                                    |
| 5                          | c.1856C>T | p.Pro619Leu | ex 13 | rs374238081<br>0.00002 | VUS (PM2, PP3, PP4) <sup>6</sup>      | Occurred homozygous (Lasseaux et al., 2018)                                                                                                                                                                                                                                                        |
| <b>HPS5 (NM_181507.1)</b>  |           |             |       |                        |                                       |                                                                                                                                                                                                                                                                                                    |
| 1                          | c.434G>A  | p.Gly145Glu | ex 5  | rs1355819005           | LP (PS3, PM2, PP3, PP4)               | In vitro studies showed that this variant prevents proper BLOC-2 formation (Nazarian et al., 2008)                                                                                                                                                                                                 |
| 2                          | c.719G>C  | p.Arg240Pro | ex 7  | -                      | LP (PM2, PM3, PP3, PP4)               | Parental testing showed that this variant occurs in trans with a pathogenic variant (del1.5kb) (Michaud et al., 2017; Lasseaux et al., 2018)                                                                                                                                                       |

|                           |                        |                            |       |                        |                                       |                                                                                                                                                                                                                               |
|---------------------------|------------------------|----------------------------|-------|------------------------|---------------------------------------|-------------------------------------------------------------------------------------------------------------------------------------------------------------------------------------------------------------------------------|
| 3                         | c.1871T>G <sup>7</sup> | p.Leu624Arg <sup>11</sup>  | ex 16 | rs281865102            | LP (PM2, PM3, PP3, PP4)               | (Huizing et al., 2004). <sup>11</sup> Parental testing of one subject showed that this variant is in trans with a pathogenic frameshift variant (p.Leu992Valfs*17) (Michaud et al., 2017; Lasseaux et al., 2018) <sup>7</sup> |
| 4                         | c.2219T>C              | p.Leu740Ser                | ex 16 | -                      | VUS (PM2, PP3, PP4) <sup>6</sup>      | (Lasseaux et al., 2018; Michaud et al., 2017)                                                                                                                                                                                 |
| 5                         | c.2234T>C              | p.Leu745Ser                | ex 16 | -                      | VUS (PM2, PP3, PP4) <sup>6</sup>      | (Wei et al., 2016)                                                                                                                                                                                                            |
| -                         | c.3293C>T <sup>7</sup> | p.Thr1098Ile <sup>11</sup> | ex 22 | rs61884288<br>0.02362  | -                                     | (Huizing et al., 2004). High MAF and low pathogenicity scores classify this variant as a benign SNP <sup>11</sup>                                                                                                             |
| 6                         | c.3346A>G              | p.Met1116Val               | ex 23 | -                      | VUS (PM2, PP3, PP4) <sup>6</sup>      | (Wei et al., 2016)                                                                                                                                                                                                            |
| <b>HPS6 (NM_024747.5)</b> |                        |                            |       |                        |                                       |                                                                                                                                                                                                                               |
| 1                         | c.233C>G               | p.Pro78Arg                 | ex 1  | -                      | VUS (PM2, PP4) <sup>6</sup>           | (Okamura et al., 2019)                                                                                                                                                                                                        |
| 2                         | c.275T>A               | p.Leu92Gln                 | ex 1  | -                      | VUS (PM2, PP3, PP4) <sup>6</sup>      | Occurred homozygous (Lasseaux et al., 2018)                                                                                                                                                                                   |
| 3                         | c.337C>T               | p.Arg113Trp                | ex 1  | rs371307947<br>0.00033 | VUS (PM2, PP4) <sup>6</sup>           | (Lasseaux et al., 2018)                                                                                                                                                                                                       |
| 4                         | c.383T>C               | p.Val128Ala                | ex 1  | -                      | LP (PM2, PM3, PP3, PP4)               | Occurred homozygous. Associated with reduced <i>HPS6</i> mRNA and protein expression (Han et al., 2018)                                                                                                                       |
| 5                         | c.779G>A               | p.Gly260Glu                | ex 1  | -                      | VUS (PM2, PP1, PP3, PP4) <sup>6</sup> | Occurred homozygous in 2 siblings (Hull et al., 2016)                                                                                                                                                                         |
| 6                         | c.815C>T               | p.Thr272Ile                | ex 1  | rs281865109            | LP (PM2, PM3, PP3, PP4)               | Shown to occur in trans with pathogenic variant c.238dupG (PM3) (Huizing et al., 2009)                                                                                                                                        |
| 7                         | c.823C>T               | p.Pro275Ser                | ex 1  | rs756325364<br>0.00001 | VUS (PM2, PP3, PP4) <sup>6</sup>      | (Yousaf et al., 2016)                                                                                                                                                                                                         |
| 8                         | c.895C>T               | p.Arg299Trp                | ex 1  | rs201628418<br>0.00001 | VUS (PM2, PP4) <sup>6</sup>           | (Wei et al., 2016)                                                                                                                                                                                                            |
| 9                         | c.896G>C               | p.Arg299Pro                | ex 1  | -                      | VUS (PM2, PP4) <sup>6</sup>           | (Lasseaux et al., 2018)                                                                                                                                                                                                       |
| 10                        | c.905G>A               | p.Gly302Asp                | ex 1  | -                      | VUS (PM2, PP4) <sup>6</sup>           | Occurred homozygous (Lasseaux et al., 2018)                                                                                                                                                                                   |
| 11                        | c.2207T>C              | p.Leu736Pro                | ex 1  | -                      | LP (PM2, PM3, PP3, PP4)               | Occurs in trans with pathogenic variant p.Arg463* (PM3) (Lasseaux et al., 2018)                                                                                                                                               |

<sup>1</sup> Pathogenicity predictions following ACMG Standards and Guidelines for interpretation of sequence variants All variants were scored as Pathogenic (P, **Red**), Likely Pathogenic (LP, **Yellow**) and Variant of Unknown Significance (VUS, **Green**). Pathogenicity criteria for each variant are listed as PVS = Pathologic Very Strong; PS = Pathologic Strong; PM = pathologic Moderate; PS = Pathologic Supporting see (Richards et al., 2015) for more details.

<sup>2</sup> Reference SNP ID number per dbSNP (<https://www.ncbi.nlm.nih.gov/snp>). Searched in November 2019.

<sup>3</sup> Minor Allele Frequency (MAF) as reported by ExAc Aggregated Populations (121412 chromosomes) (<http://exac.broadinstitute.org/>). Searched in November 2019. The variant was scored PM2 if MAF <0.001.

<sup>4</sup> A variant was scored PP3, by using the in silico prediction program Mutationtaster (<http://www.mutationtaster.org/>), which bases pathogenicity on a combination criteria. A MutationTaster prediction of "disease causing" resulted in a PP3 score of the variant.

<sup>5</sup> A variant was scored PP4 if the affected subjects's phenotype or family history is highly specific for HPS. The references describing PP4 are indicated in the "Comments" column.

<sup>6</sup> To prove pathogenicity of this variant according to ACMG Guidelines, experimental evidence needs to be acquired and can include effect on protein expression, BLOC assembly, mRNA splicing (PS3 score) and in some cases testing parents to demonstrate occurrence in trans with a pathogenic variant (PM3) is sufficient.

- <sup>7</sup>This *HPS1* variant was identified in one unreported subject of *Canadian-German-Irish-Scottish-Swedish-Ukrainian* descent from the NIH HPS cohort. This subject is compound heterozygous for c.1080C>G and c.1189delC.
- <sup>8</sup>These 2 *HPS1* missense variants occur heterozygous on the same allele in two HPS siblings of our NIH cohort, their cells showed aberrant BLOC-3 assembly (Nazarian et al., 2008). The p.Val547Leu variant is predicted to be more pathogenic than p.Arg549Cys. In vitro studies showed that the *HPS1* protein with the p.Val547Leu variant was unstable and prevents proper BLOC-3 formation (Carmona-Rivera et al., 2013). No *HPS1* coding/splice site was detected on the other allele, but that allele appeared to be subject to non-sense mediated mRNA decay (on cDNA analysis), suggesting a (intronic) gene-truncation variant on that allele.
- <sup>9</sup>This *HPS1* variant was found heterozygous in one unreported subject of *English-Irish-Scottish* in the NIH HPS cohort. This subject is compound heterozygous for c.1189delC and c.1937A>G.
- <sup>10</sup>This *AP3B1* variant activates a cryptic donor splice and causes a deletion of 112bp within exon 23 on the mRNA level, resulting in a frame shift and a premature termination codon p.Val900Thrfs\*63 (de Boer et al., 2017).
- <sup>11</sup>Two siblings were both homozygous for these 2 missense *HPS5* variants (hemizyosity was excluded) [Huizing et al., 2004]. The high MAF (including homozygotes) low pathogenicity predictions of p.Thr1098Ile in contrast to high pathogenicity predictions of p.Leu624Arg as well as recent identification of this variant in other HPS-5 cases in trans with a pathogenic variant (Michaud et al., 2017; Lasseaux et al., 2018) classifies p.Leu624Arg as likely pathogenic and p.Thr1098Ile as a benign SNP.

**Supplemental Table S2: Predicted Splicing Effects of HPS Variants in Proximity of Splice Junctions <sup>1</sup>**

| No                                | Variant <sup>1</sup> | Loca-<br>tion | Exp.<br>Splice<br>Effect <sup>2</sup> | Predicted<br>Splice Effect <sup>3</sup> |     | Comments                                                                                                                                                                                                            | References <sup>4</sup>                             |
|-----------------------------------|----------------------|---------------|---------------------------------------|-----------------------------------------|-----|---------------------------------------------------------------------------------------------------------------------------------------------------------------------------------------------------------------------|-----------------------------------------------------|
|                                   |                      |               |                                       | wt                                      | var |                                                                                                                                                                                                                     |                                                     |
| <b>Reported Intronic Variants</b> |                      |               |                                       |                                         |     |                                                                                                                                                                                                                     |                                                     |
| HPS1                              | c.255+5G>A           | in 4          | Yes                                   | 99%                                     | 51% | Demonstrated to result in a 17-bp deletion and a frameshift p.Tyr81Leufs*38                                                                                                                                         | (Ghafouri-Fard et al., 2016)                        |
| HPS1                              | c.398+2T>C           | in 5          | ND                                    | 75%                                     | 0%  | Predicted to cause splicing defect                                                                                                                                                                                  | <i>novel</i> <sup>5</sup>                           |
| HPS1                              | c.398+5G>A           | in 5          | Yes                                   | 75%                                     | 0%  | Demonstrated to result in skipping of exon 5                                                                                                                                                                        | (Suzuki et al., 2004)                               |
| HPS1                              | c.507+1G>A           | in 6          | Yes                                   | 57%                                     | 0%  | Demonstrated to result in use of an alternative intronic splice donor site (72%), 43-bp into intron 6, causing a frameshift of the coding region, and premature stop codon 26 amino acids downstream of the variant | (Natsuga et al., 2005)                              |
| HPS1                              | c.868-2A>G           | in 9          | ND                                    | 83%                                     | 0%  | Predicted to cause splicing defect                                                                                                                                                                                  | (Wei et al., 2019)                                  |
| HPS1                              | c.988-1G>T           | in 11         | Yes                                   | 99%                                     | 0%  | Demonstrated to result in exon 12 in-frame skipping and removing 56 amino acids from the protein                                                                                                                    | (Vincent et al., 2009)                              |
| HPS1                              | c.1744-2A>C          | in 17         | Yes                                   | 99%                                     | 0%  | Predicted to cause splicing defect                                                                                                                                                                                  | (Oetting and King, 1999; Hermos et al., 2002)       |
| HPS1                              | c.1857+2T>C          | in 18         | ND                                    | 91%                                     | 0%  | Predicted to create an alternative intronic splice site 4-bp into intron 18 (94%), resulting in a frameshift of the coding region                                                                                   | (McElvaney et al., 2018)                            |
| HPS1                              | c.1858-1G>A          | in 18         | ND                                    | 96%                                     | 53% | Predicted to create alternative splice site (53%) 1-bp into exon 18, resulting in a frameshift of the coding region                                                                                                 | <i>novel</i> <sup>5</sup>                           |
| HPS1                              | c.1941-2A>G          | in 19         | ND                                    | 98%                                     | 0%  | Predicted to cause splicing defect                                                                                                                                                                                  | (Okamura et al., 2019)                              |
| AP3B1                             | c.1095+5G>A          | in 10         | ND                                    | 100%                                    | 50% | Predicted to weaken the splice site, a cryptic splice site 19-bp into intron 10 (28%) may get activated                                                                                                             | (Chiang et al., 2010)                               |
| AP3B1                             | c.1168-1G>C          | in 11         | Yes                                   | 98%                                     | 0%  | Demonstrated to cause skipping of exon 12. Initially reported as a 21-amino acid deletion, later found to be caused by skipping of exon 12                                                                          | (Dell'Angelica et al., 1999; Gochuico et al., 2012) |
| AP3B1                             | c.1473+6T>C          | in 14         | Yes                                   | 90%                                     | 27% | Demonstrated to activate a cryptic splice site 39-bp into intron 14, resulting in a premature stop codon                                                                                                            | (Clark et al., 2003)                                |
| HPS3                              | c.712+2T>C           | in 2          | Yes                                   | 99%                                     | 0%  | Predicted to cause splicing defect. Cells of this subject showed destabilized BLOC-2 assembly                                                                                                                       | (Wei et al., 2016)                                  |
| HPS3                              | c.885-1G>A           | in 3          | ND                                    | 55%                                     | 0%  | Predicted to cause a splicing defect                                                                                                                                                                                | (Thielen et al., 2010)                              |
| HPS3                              | c.1163+1G>A          | in 5          | Yes                                   | 79%                                     | 0%  | Demonstrated to cause skipping of exon 5                                                                                                                                                                            | (Huizing et al., 2001)                              |
| HPS3                              | c.1691+1G>A          | in 9          | ND                                    | 81%                                     | 0%  | Predicted to cause exon 9 skipping, similar as c.1691+2T>G                                                                                                                                                          | <i>novel</i> <sup>5</sup>                           |
| HPS3                              | c.1691+2T>G          | in 9          | Yes                                   | 81%                                     | 0%  | Demonstrated to cause skipping of exon 9                                                                                                                                                                            | (Huizing et al., 2001)                              |
| HPS3                              | c.2482-2A>G          | in 13         | Yes                                   | 92%                                     | 0%  | Demonstrated to cause skipping of exon 13                                                                                                                                                                           | (Huizing et al., 2001)                              |
| HPS3                              | c.2589+1G>C          | in 14         | Yes                                   | 100%                                    | 0%  | Demonstrated to cause skipping of exon 14                                                                                                                                                                           | (Huizing et al., 2001)                              |
| HPS3                              | c.2589+1G>T          | in 14         | ND                                    | 100%                                    | 0%  | Predicted to cause exon 14 skipping, similar as c.2589+1G>T                                                                                                                                                         | <i>novel</i> <sup>5</sup>                           |

|                                                                                 |                           |       |     |      |     |                                                                                                                                                                                                                                                                           |                                            |
|---------------------------------------------------------------------------------|---------------------------|-------|-----|------|-----|---------------------------------------------------------------------------------------------------------------------------------------------------------------------------------------------------------------------------------------------------------------------------|--------------------------------------------|
| HPS3                                                                            | c.2888-1612G>A            | in 16 | Yes | 0%   | 87% | This deep-intronic variant creates a strong (87%) consensus splice site, inserting of 89-bp in the subject's HPS3 mRNA                                                                                                                                                    | (Huizing et al., 2001)                     |
| HPS4                                                                            | c.276+5G>A                | in 4  | ND  | 99%  | 61% | Predicted to cause splicing defect                                                                                                                                                                                                                                        | (Yousaf et al., 2016)                      |
| HPS4                                                                            | c.596+1G>A                | in 7  | ND  | 81%  | 20% | Predicted to weaken the splice site                                                                                                                                                                                                                                       | (Okamura et al., 2019)                     |
| HPS4                                                                            | c.597-2A>T                | in 7  | ND  | 76%  | 0%  | Predicted to cause splicing defect                                                                                                                                                                                                                                        | (Jones et al., 2012)                       |
| HPS4                                                                            | c.706+1G>A                | in 9  | ND  | 99%  | 5%  | Predicted to cause splicing defect                                                                                                                                                                                                                                        | <i>novel</i> <sup>5</sup>                  |
| HPS4                                                                            | c.1713+5G>C               | in 11 | ND  | 98%  | 0%  | Predicted to cause splicing defect                                                                                                                                                                                                                                        | (Wei et al., 2019)                         |
| HPS5                                                                            | c.285-10A>G               | in 4  | Yes | 23%  | 26% | Reported to activate a cryptic splice site, leading to an in-frame insertion of 9-bp and reduced expression of HPS5                                                                                                                                                       | (Stephen et al., 2017)                     |
| HPS5                                                                            | c.1634+1G>A               | in 13 | Yes | 97%  | 0%  | Reported to result in skipping of exon 13                                                                                                                                                                                                                                 | (Carmona-Rivera et al., 2011)              |
| HPS5                                                                            | c.3058+3A>G               | in 21 | ND  | 99%  | 78% | Predicted to cause a splicing defect                                                                                                                                                                                                                                      | (Michaud et al., 2017)                     |
| <b>Exonic (Missense) Variants in Proximity of Splice Junctions <sup>4</sup></b> |                           |       |     |      |     |                                                                                                                                                                                                                                                                           |                                            |
| HPS1                                                                            | c.2T>A/<br>p.Met1Lys      | ex 3  | ND  | 92%  | 75% | Predicted to weaken the nearby splice site at c.1                                                                                                                                                                                                                         | (Lasseaux et al., 2018)                    |
| HPS1                                                                            | c.505G>A/<br>p.Glu169Lys  | ex 6  | ND  | 57%  | 7%  | Occurs 3-bp from splice junction and predicted to weaken the splice site. No experimental evidence is available. An alternative intronic splice site (72%), inserting 43-bp of intron 6 sequence may be used as reported for variant c.507G>A occurring in the same codon | (Merideth et al., 2009; Khan et al., 2016) |
| HPS1                                                                            | c.507G>A/<br>p.Glu169Glu  | ex 6  | Yes | 57%  | 0%  | Occurs at a 3' splice junction. Reported to result in use of an alternative intronic splice site (72%), inserting 43-bp of intron 6 sequence, resulting in frameshift and 26 novel amino acids followed by a stop codon                                                   | (Merideth et al., 2009)                    |
| HPS1                                                                            | c.937G>A/<br>p.Gly313Ser  | ex 10 | Yes | 100% | 86% | Occurs at a 3' splice junction. Reported to result in use of a cryptic intronic splice site 144-bp downstream, producing 11 novel amino acids followed by a stop codon                                                                                                    | (Carmona-Rivera et al., 2011)              |
| HPS1                                                                            | c.1342T>C/<br>p.Trp448Arg | ex 14 | ND  | 95%  | 95% | Predicted to not affect nearby splice site at c.1336                                                                                                                                                                                                                      | (Yousaf et al., 2016)                      |
| HPS1                                                                            | c.1937A>G/<br>p.Tyr646Cys | ex 19 | ND  | 81%  | 55% | Predicted to weaken the nearby splice site at c.1940                                                                                                                                                                                                                      | <i>novel</i> <sup>5</sup>                  |
| AP3B1                                                                           | c.2702C>G/<br>p.Ser901Cys | ex 23 | Yes | 0%   | 4%  | Demonstrated to activate a cryptic donor splice site and cause a mRNA deletion of 112bp, resulting in a frame shift and a premature termination codon p.Val900Thrfs*63                                                                                                    | (de Boer et al., 2017)                     |
| HPS3                                                                            | c.1509G>A/<br>p.Met503Ile | ex 8  | ND  | 8%   | 0%  | Predicted to affect splicing of exon 8. Note that the exon 8/intron 8 splice site is weak (8%)                                                                                                                                                                            | (Yousaf et al., 2016)                      |
| HPS4                                                                            | c.272T>C/<br>p.Leu91Pro   | ex 4  | ND  | 99%  | 99% | Predicted to not affect nearby splice site at c.276                                                                                                                                                                                                                       | (Bastida et al., 2019)                     |
| HPS4                                                                            | c.803G>A/<br>p.Arg268Lys  | ex 10 | ND  | 92%  | 0%  | Predicted to cause splicing defect                                                                                                                                                                                                                                        | (Lasseaux et al., 2018)                    |

|             |                           |       |    |      |     |                                                      |                                              |
|-------------|---------------------------|-------|----|------|-----|------------------------------------------------------|----------------------------------------------|
| <i>HPS5</i> | c.219G>A/<br>p.Arg73Arg   | ex 3  | ND | 100% | 82% | Predicted to cause splicing defect at c.219          | (Michaud et al., 2017)                       |
| <i>HPS5</i> | c.1871T>G/<br>p.Leu624Arg | ex 16 | ND | 96%  | 97% | Predicted to not affect nearby splice site at c.1863 | (Huizing et al., 2004; Michaud et al., 2017) |

<sup>1</sup> Exonic cDNA variants resulting in protein variants located within 10-bp from a splice junction are listed.

<sup>2</sup> Experimental (Exp.) Splice Effect: as reported in literature; ND = Not Done. Yes = Splice site effect was demonstrated experimentally.

<sup>3</sup> Using Human Splice Site Prediction by Neural Network ([http://www.fruitfly.org/seq\\_tools/splice.html](http://www.fruitfly.org/seq_tools/splice.html)), comparing wild type (wt) sequence to variant (var) sequence. The NNSPLICE 0.9 version (January 1997) of this splice site predictor was used (in November 2019) (Reese et al., 1997). Predicted Splice Site Scores are visualized as follows: **Green** (high splice site prediction >85%), **Yellow** (medium splice site prediction 55-85%), **Red** (low splice site prediction <55%).

<sup>4</sup> See main text for full references.

<sup>5</sup> *novel* = previously unreported variant detected in the NIH HPS cohort.

**Supplemental Table S3:** Frequent Nonsynonymous SNPs (MAF>0.001) in Human HPS Genes

| Gene         | dbSNP ID <sup>1</sup> | Variant <sup>2</sup>                      | MAF (gnomAD) <sup>3</sup> |
|--------------|-----------------------|-------------------------------------------|---------------------------|
| <b>HPS1</b>  | rs58548334            | c.11T>C; p.Val4Ala                        | 0.0322                    |
|              | rs7914192             | c.27G>C; p.Glu9Asp                        | 0.0017                    |
|              | rs142893758           | c.478C>T; p.Arg160Trp                     | 0.0014                    |
|              | rs1801286             | c.557C>T; p.Ala186Val                     | 0.0042                    |
|              | rs56378825            | c.779G>C; p.Arg260Gln                     | 0.0023                    |
|              | rs11592273            | c.847G>T; p.Gly283Trp                     | 0.0491                    |
|              | rs74154475            | c.848G>C; p.Gly283Ala                     | 0.0017                    |
|              | rs2296434             | c.1472C>G; p.Pro491Arg                    | 0.1071                    |
|              | rs2296436             | c.1808A>G; p.Gln603Arg                    | 0.1014                    |
|              | rs139061260           | c.1888G>A; p.Val630Ile <sup>5</sup>       | 0.0013                    |
| <b>AP3B1</b> | rs142025324           | c.1069A>G; p.Ile357Val                    | 0.0018                    |
|              | rs6453373             | c.1754T>A; p.Val585Glu                    | 0.8661                    |
|              | rs113301033           | c.2042A>G; p.Glu681Gly                    | 0.0013                    |
|              | rs62001050            | c.2324T>A; p.Ile775Lys                    | 0.0022                    |
|              | rs199702315           | c.2409_2411del; p.Lys804del <sup>6</sup>  | 0.0138                    |
|              | rs146624866           | c.2585C>T; p.Thr862Ile                    | 0.0017                    |
|              | rs139344924           | c.2661C>A; p.Phe887Leu                    | 0.0078                    |
|              | rs146503597           | c.2995G>A; p.Val999Met                    | 0.0041                    |
|              | rs111935323           | c.2873_2875del; p.Ala1008del <sup>6</sup> | 0.0115                    |
| <b>HPS3</b>  | rs199663930           | c.158A>G; p.Gln53Arg                      | 0.0011                    |
|              | rs34388030            | c.823G>A; p.Glu275Lys                     | 0.0019                    |
|              | rs149640235           | c.1366A>G; p.Ile456Val                    | 0.0015                    |
|              | rs78336249            | c.2215G>A; p.Gly739Arg                    | 0.0099                    |
|              | rs150765088           | c.2527G>A; p.Val843Ile                    | 0.0012                    |
| <b>HPS4</b>  | rs149830675           | c.250A>G; p.Ile84Val                      | 0.0044                    |
|              | rs713998              | c.686A>G; p.Glu229Gly                     | 0.8432                    |
|              | rs77597168            | c.710C>T; p.Ala237Val                     | 0.0015                    |
|              | rs34962745            | c.751A>T; p.Thr251Ser                     | 0.0070                    |
|              | rs114685298           | c.1060T>A; p.Ser354Thr                    | 0.0028                    |
|              | rs116769827           | c.1061C>G; p.Ser354Cys                    | 0.0028                    |
|              | rs2014410             | c.1327C>G; p.Leu443Val                    | 0.3703                    |
|              | rs147435410           | c.1396C>T; p.Arg466Cys                    | 0.0015                    |
|              | rs5752330             | c.1654G>A; p.Val552Met                    | 0.8431                    |
|              | rs1894706             | c.1816C>T; p.His606Tyr                    | 0.8770                    |
|              | rs1894704             | c.1875G>T; p.Gln625His                    | 0.8769                    |
|              | rs146303784           | c.1947G>A; p.Met649Ile                    | 0.0013                    |
| <b>HPS5</b>  | rs147053126           | c.241G>A; p.Ala81Thr                      | 0.0016                    |



|                |             |                                      |        |
|----------------|-------------|--------------------------------------|--------|
|                | rs7128017   | c.1249C>A; p.Leu417Met               | 0.1359 |
|                | rs143784823 | c.1501G>A; p.Gly501Arg               | 0.0047 |
|                | rs149677540 | c.1609G>T; p.Val537Leu               | 0.0029 |
|                | rs144875223 | c.2537C>T; p.Pro846Leu               | 0.0044 |
|                | rs61755718  | c.3045G>A; p.Met1015Ile              | 0.0051 |
|                | rs17853184  | c.3046G>A; p.Glu1016Lys              | 0.0013 |
|                | rs116394570 | c.3217A>G; p.Met1073Val              | 0.0012 |
|                | rs75482179  | c.3229C>T; p.Arg1077Trp              | 0.0015 |
|                | rs61884288  | c.3293C>T; p.Thr1098Ile <sup>7</sup> | 0.0237 |
|                |             |                                      |        |
| <b>HPS6</b>    | rs371307947 | c.337C>T; p.Arg113Trp <sup>8</sup>   | 0.0023 |
|                | rs199816481 | c.398C>T; p.Ala133Val                | 0.0028 |
|                | rs200584437 | c.632G>C; p.Gly211Ala                | 0.0047 |
|                | rs36078476  | c.698T>G; p.Leu233Arg                | 0.0072 |
|                |             |                                      |        |
| <b>DTNBP1</b>  | rs17470454  | c.814C>T; p.Pro272Ser                | 0.0437 |
|                | rs73369534  | c.874A>G; p.Arg292Gly                | 0.0086 |
|                | rs74907982  | c.886C>T; p.Pro296Ser                | 0.0041 |
|                |             |                                      |        |
| <b>BLOC1S3</b> | rs75792246  | c.322C>G; p.Leu108Val                | 0.0266 |
|                | rs201502372 | c.478G>T; p.Val160Leu                | 0.0016 |
|                |             |                                      |        |
| <b>BLOC1S6</b> | rs145762743 | c.34G>A; p.Ala12Thr                  | 0.0027 |
|                |             |                                      |        |
| <b>AP3D1</b>   | rs34569645  | c.1621G>A; p.Gly541Arg               | 0.1242 |
|                | rs25673     | c.3400A>G; p.Ile1134Val              | 0.1239 |

<sup>1</sup> Reference SNP ID number per dbSNP (<https://www.ncbi.nlm.nih.gov/snp>). Searched in November 2019.

<sup>2</sup> Nomenclature according to the longest mRNA splice variant, similar to that used in Tables in the main text.

<sup>3</sup> Minor Allele Frequency as reported by gnomAD (<https://gnomad.broadinstitute.org/>) and ClinVar (<https://www.ncbi.nlm.nih.gov/clinvar/>). Searched in November 2019.

<sup>4</sup> This pathogenic *HPS1* frameshift variant occurs frequent in HPS subjects.

<sup>5</sup> This *HPS1* missense variant was found heterozygous in a cohort of familiar pulmonary fibrosis cases (Stearman et al., 2019).

<sup>6</sup> Two in-frame *AP3B1* 3-bp deletions with high MAF (including homozygotes) occur, which should be considered as non-pathogenic polymorphisms when encountered in *AP3B1* genetic analysis.

<sup>7</sup> This *HPS5* variant occurred on the same allele as another *HPS5* missense variant (p.Leu624Arg) in two siblings were both (Huizing et al., 2004). The high MAF (including homozygotes) low pathogenicity predictions of p.Thr1098Ile in contrast to high pathogenicity predictions of p.Leu624Arg as well as recent identification of this variant in other HPS-5 individuals (Michaud et al., 2017) classified p.Leu624Arg as pathogenic and p.Thr1098Ile as a benign SNP.

<sup>8</sup> This *HPS6* variant of uncertain significance was reported as a disease causing variant in one subject (Lasseaux et al., 2018).

**Supplemental Table S4: Reported Variants in Human HPS Genes Associated with Traits other than HPS**

| mRNA Variant                | Amino Acid Variant       | Exon/ Intron | dbSNP ID <sup>1</sup><br>MAF gnomAD <sup>2</sup> | Comments                                                                                                                                                                      |
|-----------------------------|--------------------------|--------------|--------------------------------------------------|-------------------------------------------------------------------------------------------------------------------------------------------------------------------------------|
| <b>HPS1 (NM_000195.5)</b>   |                          |              |                                                  |                                                                                                                                                                               |
| c.1286G>A                   | p.Arg429His              | ex 13        | rs201728087<br>0.00026                           | Reported heterozygous in a subject with familial pulmonary fibrosis (Stearman et al., 2019)                                                                                   |
| c.1395G>A                   | p.Trp465*                | ex 14        | -                                                | Reported <b>homozygous</b> in a Saudi-Arabian subject with absent nails. No other clinical details or reference to the HPS phenotype was reported (Abouelhoda et al., 2016).  |
| c.1888G>A                   | p.Val630Ile              | ex 19        | rs139061260<br>0.00135                           | Reported heterozygous in a subject with familial pulmonary fibrosis (Stearman et al., 2019)                                                                                   |
| c.1915G>A                   | p.Gly639Ser              | ex 19        | rs116698870<br>0.00053                           | Reported heterozygous in a subject with familial pulmonary fibrosis (Stearman et al., 2019)                                                                                   |
| <b>AP3B1 (NM_003664.4)</b>  |                          |              |                                                  |                                                                                                                                                                               |
| c.787G>T                    | p.Gly263Cys              | ex 8         | -                                                | Occurs at a splice junction and is predicted to weaken the intron 7/exon 8 splice site. Reported heterozygous in a subject with primary immunodeficiency (Gallo et al., 2016) |
| c.1075A>G                   | p.Thr359Ala <sup>4</sup> | ex 10        | rs148160411<br>0.00003                           | Reported heterozygous in individuals with HLH (Gao et al., 2015; Miao et al., 2019) <sup>4</sup>                                                                              |
| c.1254insA                  | p.Gln419Thrfs*22         | ex 13        | -                                                | Reported heterozygous in a subject with HLH (Tesi et al. 2015)                                                                                                                |
| c.1393A>G                   | p.Ile465Val              | ex 14        | -                                                | Reported heterozygous in two unrelated subjects with primary immunodeficiency disorder (Chi et al., 2018)                                                                     |
| c.1468A>G                   | p.Ile490Val              | ex 14        | -                                                | Reported heterozygous in a subject with HLH (Mukda et al., 2017)                                                                                                              |
| c.2626C>T                   | p.Arg876*                | ex 23        | rs773298750<br>0.000004                          | Reported heterozygous in a subject with HLH (Tesi et al. 2015)                                                                                                                |
| c.2671C>T                   | p.Gln891*                | ex 23        | rs780503803<br>0.000004                          | Reported heterozygous in a subject with HLH (Miao et al., 2019)                                                                                                               |
| c.3197C>T                   | p.Ser1066Phe             | ex 27        | rs764100439<br>0.00007                           | Reported heterozygous in a subject with HLH (Xu et al., 2017)                                                                                                                 |
| <b>HPS3 (NM_032383.5)</b>   |                          |              |                                                  |                                                                                                                                                                               |
| c.796G>A                    | p.Glu266Lys              | ex 3         | -                                                | Occurred heterozygous <i>de novo</i> in a proband with schizophrenia (Fromer et al., 2014)                                                                                    |
| <b>HPS4 (NM_022081.5)</b>   |                          |              |                                                  |                                                                                                                                                                               |
| c.1102insG                  | p.Asp368Glyfs*4          | ex 11        | -                                                | Reported heterozygous in a subject with sporadic pulmonary fibrosis (Deng et al., 2018)                                                                                       |
| c.1396C>T                   | p.Arg466Cys              | ex 11        | rs147435410<br>0.00150                           | Reported heterozygous in a subject with familial pulmonary fibrosis (Stearman et al., 2019)                                                                                   |
| c.1966_1967insAC            | p.Ala657Argfs*46         | ex 14        | rs752827715<br>0.000008                          | Reported heterozygous in a subject with familial pulmonary fibrosis (Stearman et al., 2019)                                                                                   |
| <b>HPS6 (NM_024747.5)</b>   |                          |              |                                                  |                                                                                                                                                                               |
| c.2326T>C                   | p.*776Arg                | ex 1         | rs200206362<br>0.00014                           | Reported heterozygous in a subject with <i>BRCA1</i> and <i>BRCA2</i> -negative breast cancer (Shahi et al., 2019)                                                            |
| <b>DTNBP1 (NM_032122.4)</b> |                          |              |                                                  |                                                                                                                                                                               |

|                               |             |       |                       |                                                                                                                                                     |
|-------------------------------|-------------|-------|-----------------------|-----------------------------------------------------------------------------------------------------------------------------------------------------|
| c.286G>T                      | p.Glu96*    | ex 5  | -                     | Reported heterozygous in a subject with sporadic pulmonary fibrosis (Deng et al., 2018)                                                             |
| c.814C>T                      | p.Pro272Ser | ex 10 | rs17470454<br>0.04371 | This variant with a high MAF (0.04358, including homozygotes) was reported as a low susceptibility allele for colorectal cancer (Webb et al., 2006) |
| <b>AP3D1</b> (NM_001261826.3) |             |       |                       |                                                                                                                                                     |
| c.273+1G>T                    | IVS3+1G>T   | in 3  | -                     | Reported <i>de novo</i> in a Japanese proband with autism spectrum disorder (Takata et al., 2018)                                                   |
| c.1217A>G                     | p.Gln406Arg | ex 13 | -                     | Reported <i>de novo</i> in a in a proband with autism spectrum disorder (Iossifov et al., 2014)                                                     |
| c.1815C>G                     | p.Asn605Lys | ex 16 | -                     | Reported <i>de novo</i> in a in a proband with schizophrenia (Fromer et al., 2014)                                                                  |

<sup>1</sup> Reference SNP ID number per dbSNP (<https://www.ncbi.nlm.nih.gov/snp>). Searched in November 2019.

<sup>2</sup> Minor Allele Frequency as reported by gnomAD (<https://gnomad.broadinstitute.org/>) and ClinVar (<https://www.ncbi.nlm.nih.gov/clinvar/>). Searched in November 2019.

<sup>3</sup> The AP3B1 p.Thr359Ala variant occurred heterozygous in one individual in parallel with a heterozygous variant in *UNC13D* (c.1232G>A; p.Arg411Gln). A synergistic function of the heterozygous variants in *AP3B1* and *UNC13D* was suggested to underlie the defect in cytotoxicity of natural killer (NK) cells and cytotoxic T-lymphocytes, which caused a fatal progressive hemophagocytic lymphohistiocytosis (HLH) in this individual (Gao et al., 2015). The same AP3B1 variant p.Thr359Ala was also found heterozygous in 3 Eastern-Asian subjects with HLH, and suggested to contribute to their phenotype (Miao et al., 2019). The same heterozygous *UNC13D* variant (p.Arg411Gln) was previously reported to act synergistically with a heterozygous *PRF1* variant, causing cytotoxic lymphocyte degranulation (K. Zhang et al., 2014).
